# Supplementary material for: Deconstructing excitation transitions in Dy3+-doped CaWO4 to develop a new ratiometric luminescent thermometry for achieving ultra-high sensing sensitivity
Source: Royal Society of Chemistry journal article supplement (doi:10.1039/d4tc02436b), 2024-01-01
Supplement: d4tc02436b1.pdf [file d4tc02436b1.pdf]

## Supporting information

### **Deconstructing excitation transitions in Dy<sup>3+</sup>-doped CaWO<sub>4</sub> to develop a new ratiometric luminescent thermometry for achieving ultra-high sensing sensitivity**

ianrui Liu,<sup>a,b</sup> Baosheng Cao,<sup>b,\*</sup> Miao Gao,<sup>b</sup> Lulu Qiu,<sup>b</sup> Yujie Weng,<sup>b</sup> Yangyang He,<sup>b</sup> Xiaoguang Han,<sup>a,\*</sup> Bin Dong<sup>b</sup>

<sup>1</sup> Department of Materials Science and Engineering, Dalian Maritime University, Dalian 116026, P. R. China

<sup>2</sup> Key Laboratory of Photosensitive Material and Device of Liaoning Province, Key Laboratory of New Energy and Rare Earth Resource Utilization of State Ethnic Affairs Commission & School of Physics and Materials Engineering, Dalian Minzu University, Dalian 116600, P. R. China

\*Corresponding Authors. E-mail: bscao@dlmu.edu.cn (B. Cao), xghan@dlmu.edu.cn (X. Han)

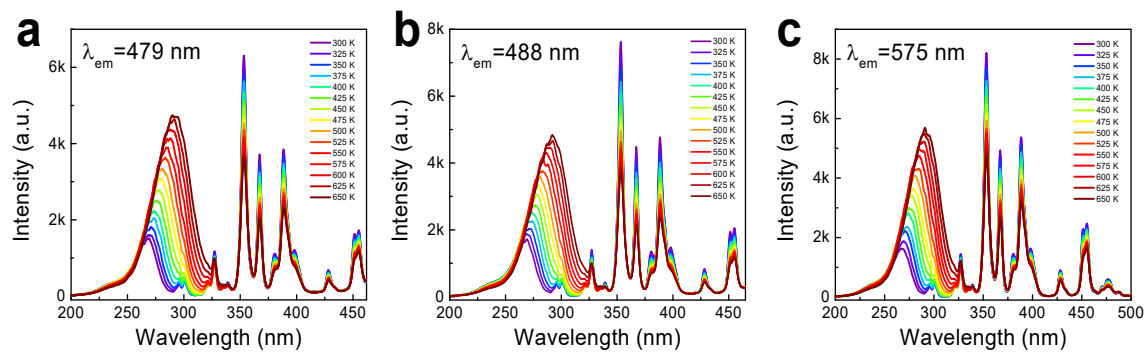

**Figure S1.** PLE spectra of  $\text{CaWO}_4:1\text{Dy}$  phosphors at the temperature range of 300 ~ 650 K by monitoring emissions at  $\lambda_{\text{em}} = 479$  nm (a), 488 nm (b), and 575 nm (c).

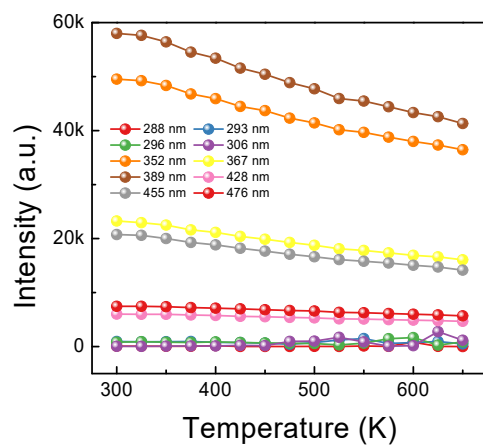

**Figure S2.** PLE intensities of various Dy<sup>3+</sup> excitation branches as a function of temperature for CaWO<sub>4</sub>:1Dy phosphors by monitoring emissions at  $\lambda_{em} = 575$  nm.

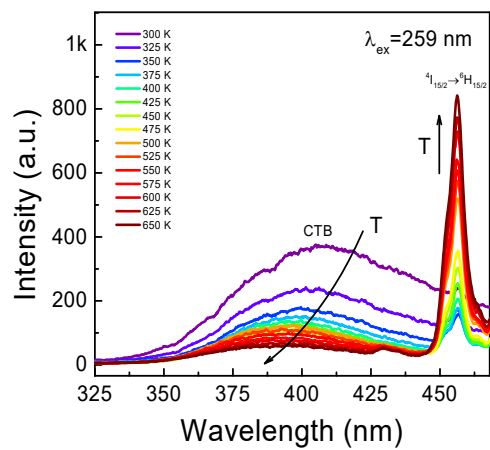

**Figure S3.** PL spectra of CaWO<sub>4</sub>:1Dy phosphors at the temperature range of 300 ~ 650 K for  $\lambda_{\text{ex}} = 259$  nm.

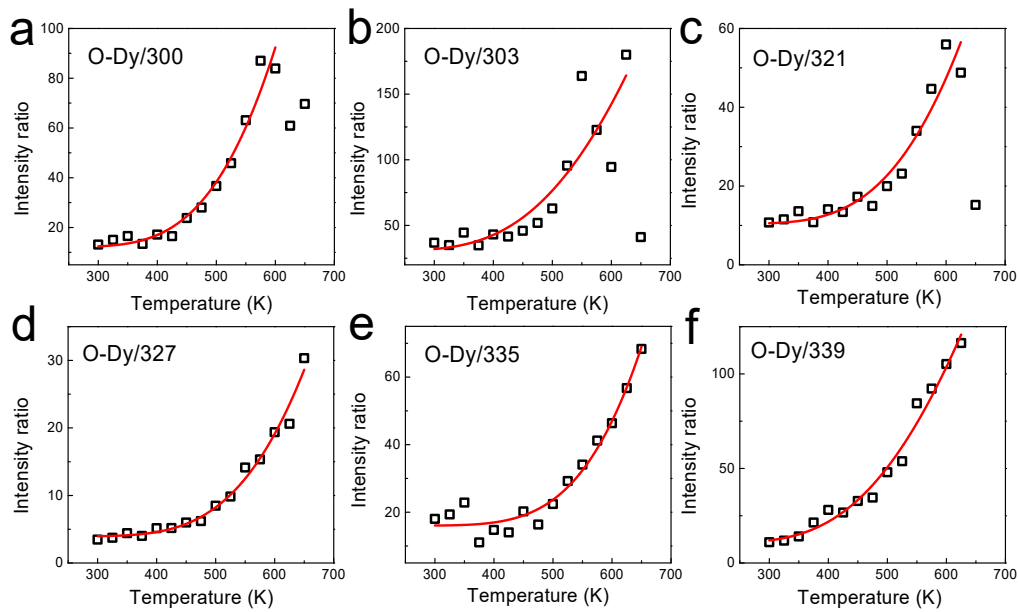

**Figure S4.** Fit of the temperature-dependent PLE intensity ratio of O-Dy to various Dy<sup>3+</sup> excitation branches by Eq. (1).

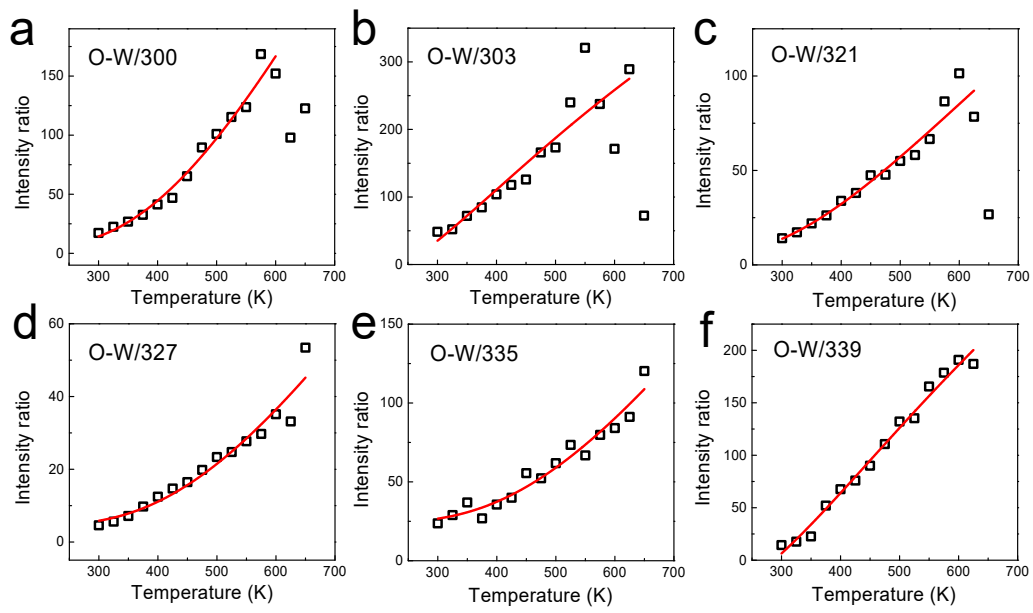

**Figure S5.** Fit of the temperature-dependent PLE intensity ratio of O-W to various  $Dy^{3+}$  excitation branches by Eq. (1).

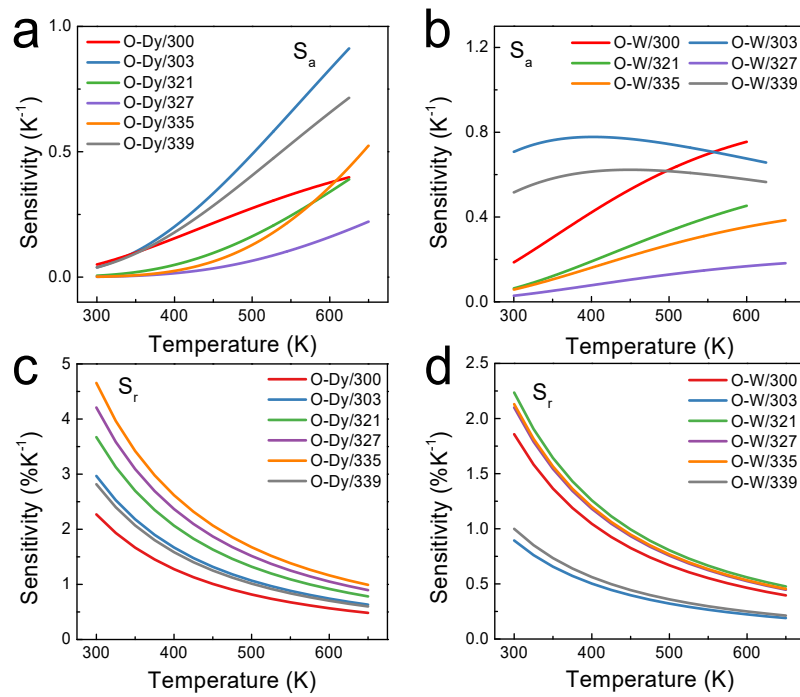

**Figure S6.** Absolute sensitivity  $S_a$  (a,b) and relative sensitivity  $S_r$  (c,d) as a function of temperature for the EIR schemes of O-Dy and O-W to various Dy<sup>3+</sup> excitation branches.

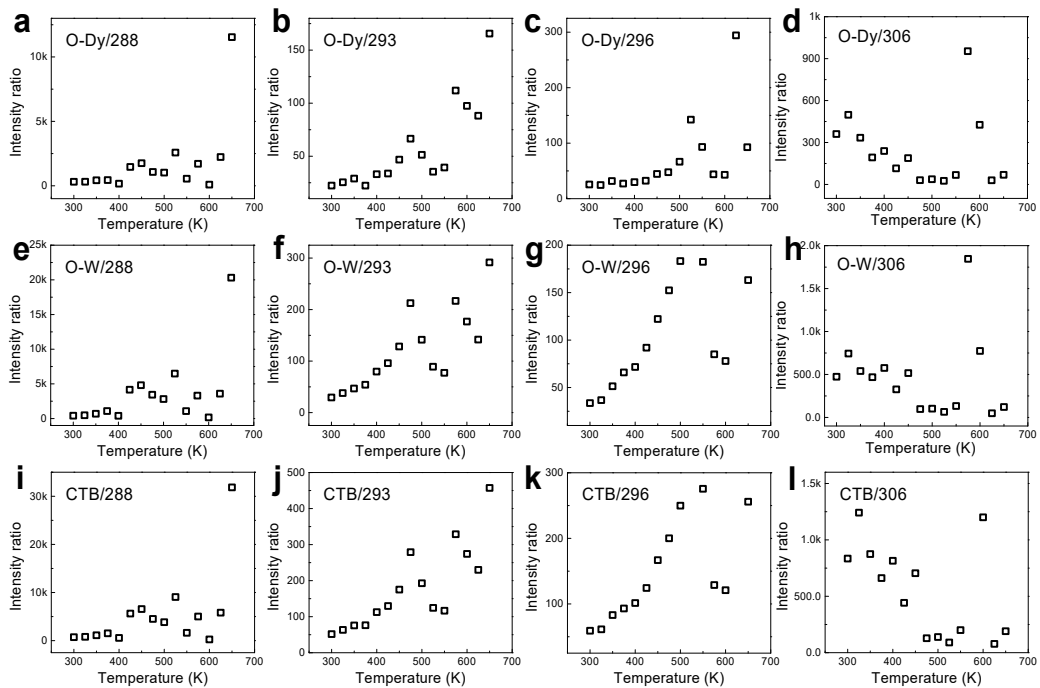

**Figure S7.** PLE intensity ratio of O-Dy/O-W/CTB to various  $\text{Dy}^{3+}$  excitation branches as a function of temperature for  $\text{CaWO}_4:1\text{Dy}$  phosphors.



**Table S1.** Experimental PLE and PL transitions in CaWO<sub>4</sub>:Dy phosphors.

|                         | Transition                                                                       | Wavelength<br>(nm) | Energy<br>(cm <sup>-1</sup> ) | Transition                                                     | Wavelength<br>(nm) | Energy<br>(cm <sup>-1</sup> ) |
|-------------------------|----------------------------------------------------------------------------------|--------------------|-------------------------------|----------------------------------------------------------------|--------------------|-------------------------------|
| CTB                     | O-Dy                                                                             | 250                | 40000                         |                                                                |                    |                               |
|                         | O-W                                                                              | 267                | 37453                         |                                                                |                    |                               |
| PLE<br>Dy <sup>3+</sup> | <sup>4</sup> F <sub>3/2</sub>                                                    | 288                | 34722                         | ( <sup>4</sup> G, <sup>2</sup> F) <sub>7/2</sub>               | 321                | 31153                         |
|                         | <sup>4</sup> P <sub>1/2</sub>                                                    | 293                | 34130                         | <sup>6</sup> P <sub>3/2</sub>                                  | 327                | 30581                         |
|                         | <sup>6</sup> H <sub>13/2</sub> ( <sup>4</sup> L, <sup>4</sup> K) <sub>13/2</sub> | 296                | 33784                         | <sup>4</sup> I <sub>9/2</sub>                                  | 335                | 29851                         |
|                         | → <sup>4</sup> G <sub>9/2</sub>                                                  | 300                | 33333                         | ( <sup>4</sup> F, <sup>4</sup> D) <sub>5/2</sub>               | 339                | 29499                         |
|                         | ( <sup>4</sup> G, <sup>4</sup> P) <sub>5/2</sub>                                 | 303                | 33003                         | <sup>6</sup> H <sub>15/2</sub> <sup>6</sup> P <sub>7/2</sub>   | 352                | 28409                         |
|                         | ( <sup>4</sup> G, <sup>4</sup> H) <sub>7/2</sub>                                 | 306                | 32680                         | → <sup>6</sup> P <sub>5/2</sub>                                | 367                | 27248                         |
|                         |                                                                                  |                    |                               | <sup>4</sup> I <sub>13/2</sub> , <sup>4</sup> F <sub>7/2</sub> | 389                | 25707                         |
|                         |                                                                                  |                    |                               | <sup>4</sup> G <sub>11/2</sub>                                 | 428                | 23364                         |
|                         |                                                                                  |                    |                               | <sup>4</sup> I <sub>15/2</sub>                                 | 455                | 21978                         |
|                         |                                                                                  |                    |                               | <sup>4</sup> F <sub>9/2</sub>                                  | 476                | 21008                         |
| CTB                     |                                                                                  | 410                | 24390                         |                                                                |                    |                               |
| PL<br>Dy <sup>3+</sup>  | <sup>4</sup> F <sub>9/2</sub> <sup>6</sup> H <sub>15/2</sub>                     | 482                | 20747                         |                                                                |                    |                               |
|                         | → <sup>6</sup> H <sub>13/2</sub>                                                 | 575                | 17391                         |                                                                |                    |                               |
|                         | <sup>6</sup> H <sub>11/2</sub>                                                   | 663                | 15083                         |                                                                |                    |                               |

**Table S2.** Fitting parameters of  $EIR = a \cdot \exp\left(-\frac{b}{T}\right) + c$  for the various EIR schemes in CaWO<sub>4</sub>:Dy phosphors.

| EIR scheme | EIR range | Fitting parameter |              |         |         |
|------------|-----------|-------------------|--------------|---------|---------|
|            |           | a                 | b            | c       |         |
| O-Dy/      | 300       | 13.1~69.7         | 1998.11      | 2042.09 | 7.17    |
|            | 303       | 36.8~180          | 9572.44      | 2670.45 | 30.7    |
|            | 321       | 10.8~55.9         | 9114.04      | 3303.78 | 10.4    |
|            | 327       | 3.47~30.3         | 8369.77      | 3786.94 | 3.94    |
|            | 335       | 18.0~68.3         | 2534.87      | 4188.56 | 16.04   |
|            | 339       | 10.9~116.3        | 6364.64      | 2534.87 | 10.6    |
|            | 352       | 0.42~2.21         | 113.69       | 2622.95 | 0.38    |
|            | 367       | 0.90~5.00         | 269.19       | 2646.62 | 0.81    |
|            | 389       | 0.36~1.95         | 103.02       | 2638.39 | 0.32    |
|            | 428       | 3.48~17.19        | 933.85       | 2666.36 | 3.15    |
|            | 455       | 1.01~5.68         | 313.03       | 2664.81 | 0.91    |
|            | 476       | 2.80~14.12        | 816.34       | 2705.41 | 2.55    |
|            | O-W/      | 300               | 17.23~168.53 | 2636.79 | 1671.67 |
| 303        |           | 48.32~289.21      | 1155.59      | 804.21  | -44.02  |
| 321        |           | 14.11~101.40      | 2318.75      | 2011.93 | 14.62   |
| 327        |           | 4.56~83.75        | 746.21       | 1890.04 | 4.46    |
| 335        |           | 23.69~120.30      | 1620.95      | 1917.46 | 23.96   |
| 339        |           | 14.38~190.83      | 1034.95      | 899.27  | -45.24  |
| 352        |           | 0.55~3.88         | 17.84        | 941.89  | -0.3    |
| 367        |           | 1.18~8.81         | 43.65        | 1004.29 | -0.53   |
| 389        |           | 0.47~3.43         | 16.42        | 977.58  | -0.23   |
| 428        |           | 4.57~30.22        | 135.94       | 935.68  | -2.05   |
| 455        |           | 1.32~9.99         | 49.99        | 1016.02 | -0.56   |
| 476        |           | 3.68~24.87        | 117.5        | 981.7   | -1.22   |
| CTB/       |           | 300               | 30.35~255.57 | 8867.92 | 2176.43 |
|            | 303       | 85.11~362.53      | 9344.32      | 2014.47 | 76.61   |
|            | 321       | 24.86~157.34      | 2822.27      | 1943.52 | 22.06   |
|            | 327       | 8.03~83.75        | 3454.23      | 2594.56 | 10.09   |
|            | 335       | 41.73~188.56      | 10211.85     | 2819.27 | 44.85   |
|            | 339       | 25.32~303.27      | 3008.21      | 1386.49 | -9.48   |
|            | 352       | 0.98~6.09         | 57.58        | 1505.53 | 0.56    |
|            | 367       | 2.08~13.81        | 141.45       | 1557.71 | 1.23    |
|            | 389       | 0.83~5.37         | 53.16        | 1535.8  | 0.49    |
|            | 428       | 8.05~47.38        | 449.24       | 1517.6  | 4.98    |
|            | 455       | 2.33~15.67        | 163.03       | 1571.49 | 1.40    |
|            | 476       | 6.49~38.99        | 394.9        | 1561.93 | 4.23    |
